# Supplementary material for: Biomechanics and energetics of walking in powered ankle exoskeletons using myoelectric control versus mechanically intrinsic control
Source: Springer Nature journal article supplement (doi:10.1186/s12984-018-0379-6), 2018-05-25
Supplement: MOESM1 [file 15793114]

**Table S1 Root mean square electromyography for muscles of interest**

|                                 | Unpowered   | Timing-Based<br>Mechanically Intrinsic | Dynamic Gain<br>Proportional Myoelectric | <i>P</i> -Value |
|---------------------------------|-------------|----------------------------------------|------------------------------------------|-----------------|
| Soleus r.m.s.                   | 1.00 ± 0.00 | 0.72 ± 0.01                            | 0.81 ± 0.06                              | 0.132           |
| Tibialis Anterior r.m.s.        | 1.00 ± 0.00 | 0.94 ± 0.04                            | 0.89 ± 0.05                              | 0.087           |
| Medial Gastrocnemius r.m.s.     | 1.00 ± 0.00 | 0.84 ± 0.06                            | 0.89 ± 0.07                              | 0.423           |
| Biceps Femoris Long Head r.m.s. | 1.00 ± 0.00 | 0.87 ± 0.07                            | 0.78 ± 0.08                              | 0.156           |
| Vastus Lateralis r.m.s.         | 1.00 ± 0.00 | 1.05 ± 0.03                            | 0.98 ± 0.04                              | 0.249           |
| Rectus Femoris r.m.s.           | 1.00 ± 0.00 | 0.91 ± 0.07                            | 0.87 ± 0.09                              | 0.394           |
| Gluteus Maximus r.m.s.          | 1.00 ± 0.00 | 0.86 ± 0.04                            | 0.85 ± 0.04                              | 0.550           |

Values (means ± s.e.m.) are root mean square (r.m.s.) average from the whole walking stride normalized to the unpowered condition.  $P < 0.05$  represents a statistically significant difference between the two powered walking conditions.
